# Supplementary figures and images for: Rab GTPase-Activating Protein AS160 Is a Major Downstream Effector of Protein Kinase B/Akt Signaling in Pancreatic β-Cells
Source: Oxford University Press journal article supplement (doi:10.2337/db07-1469), 2008-02-15

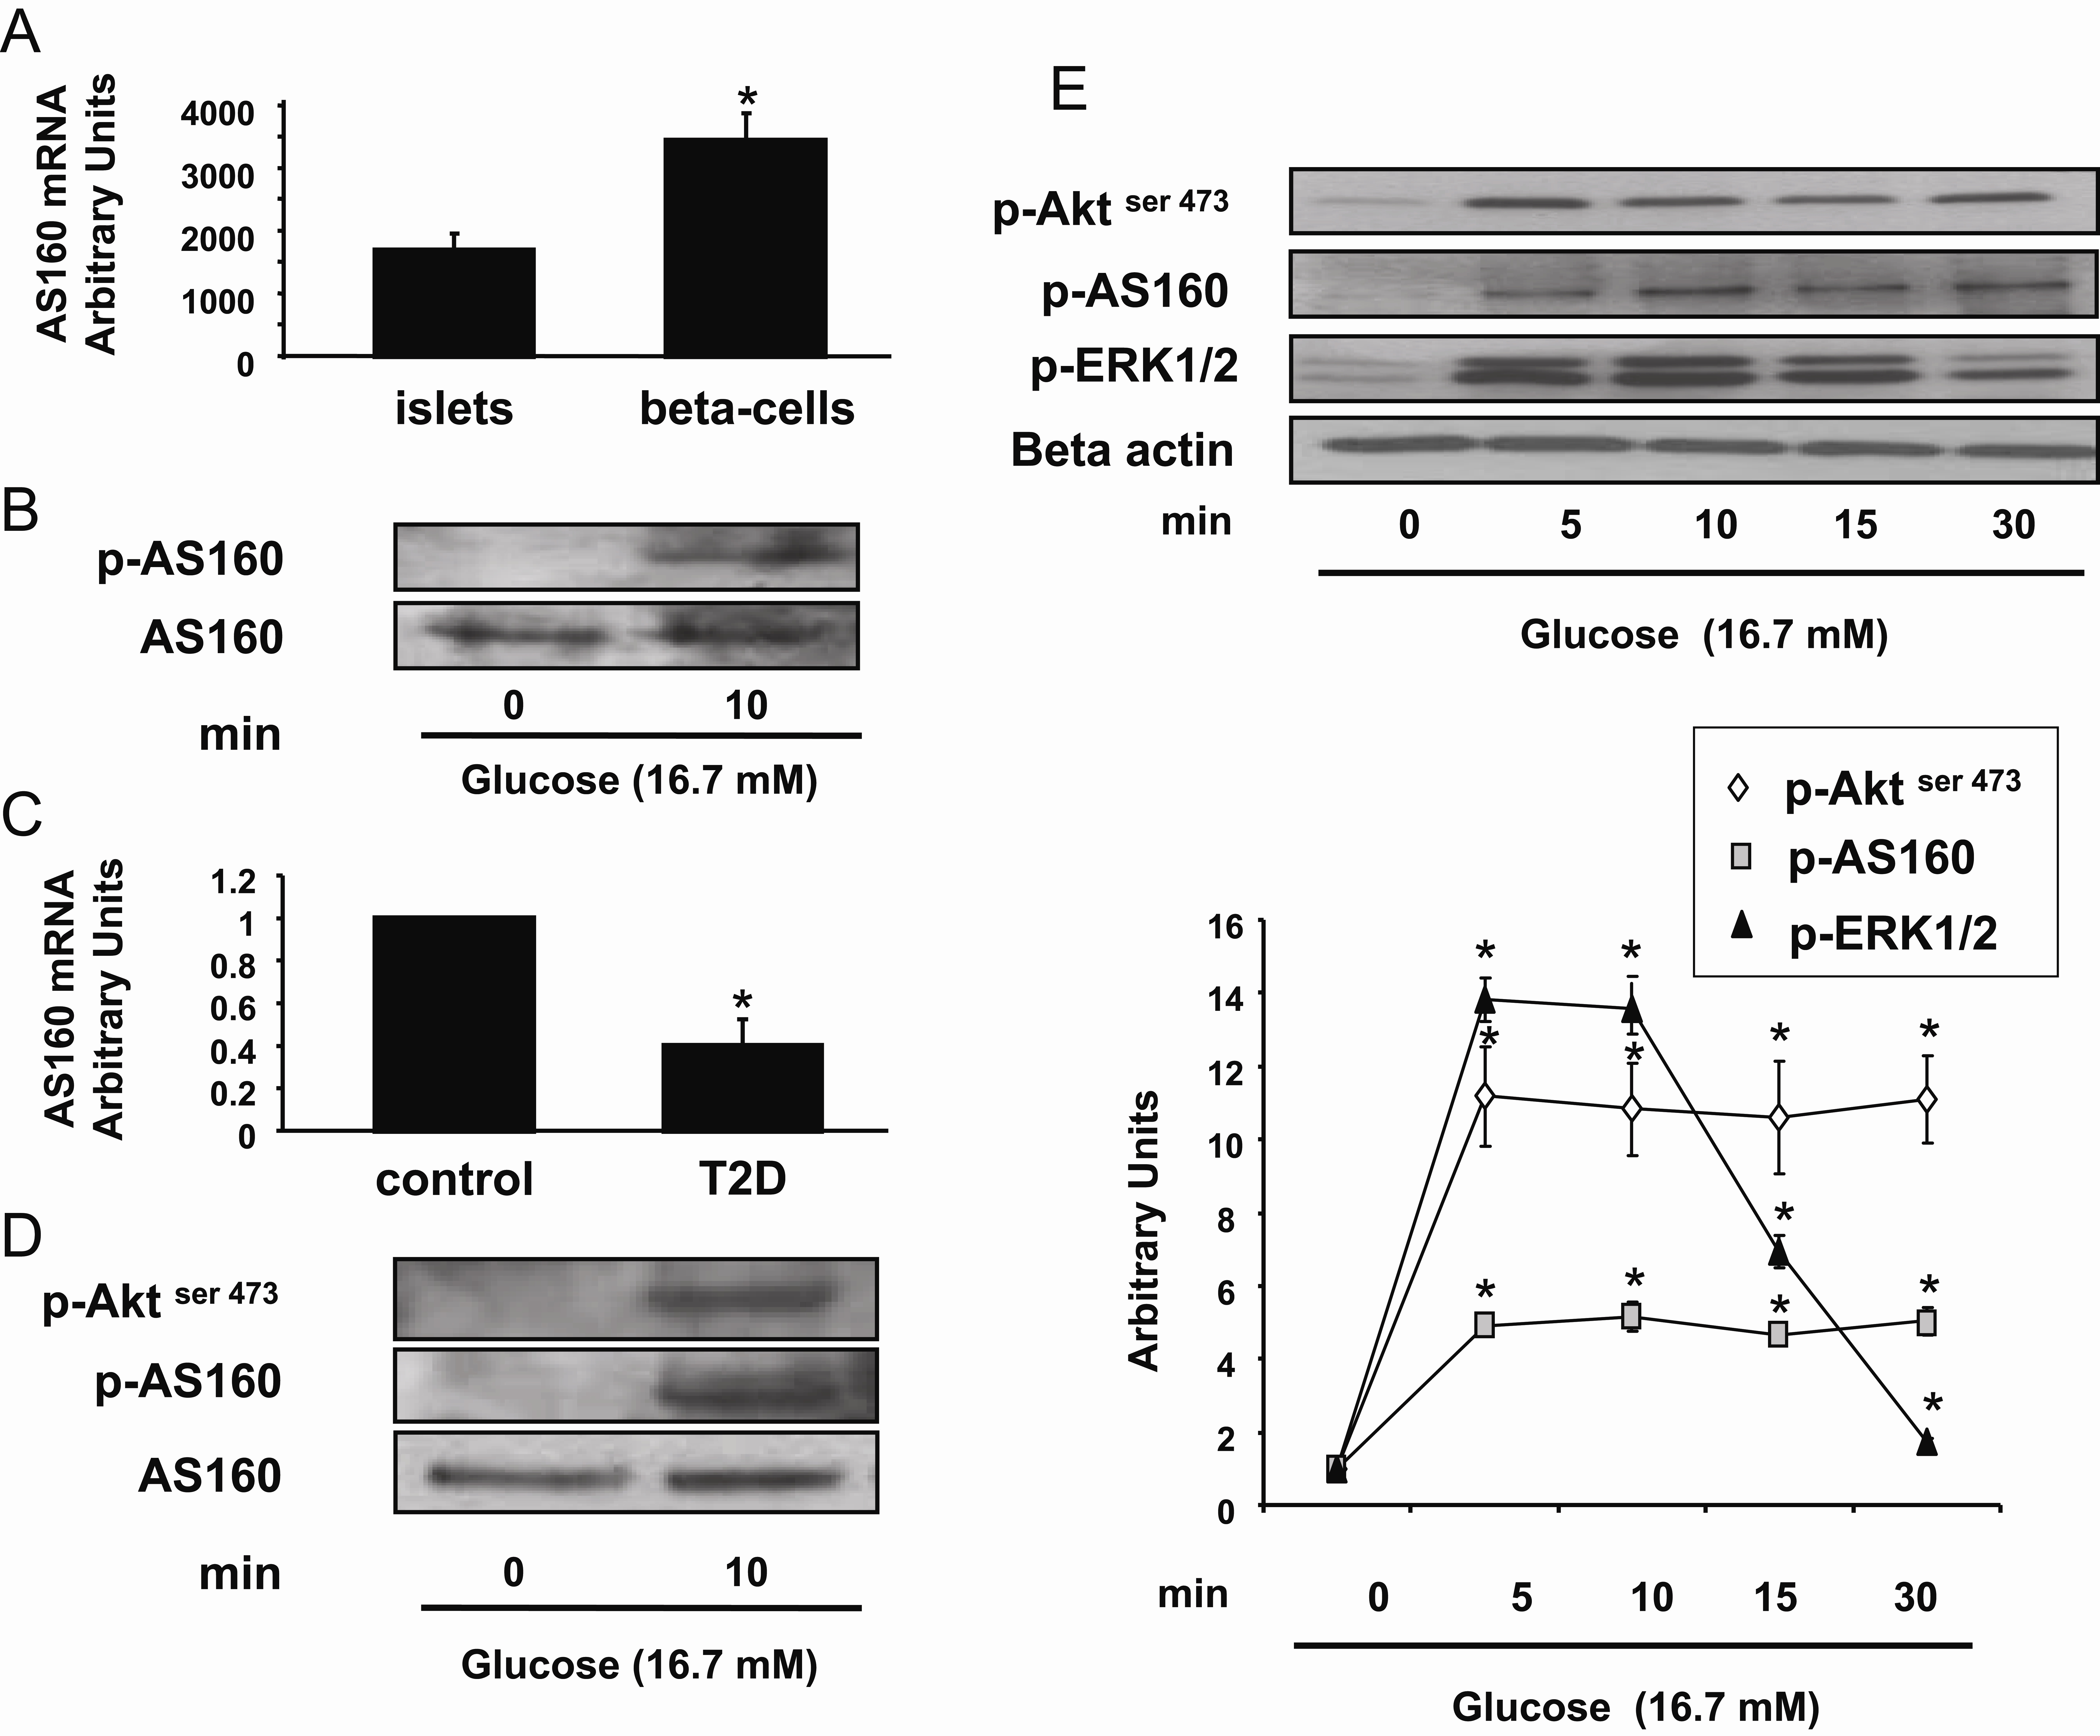
**FIGURE 1**

**
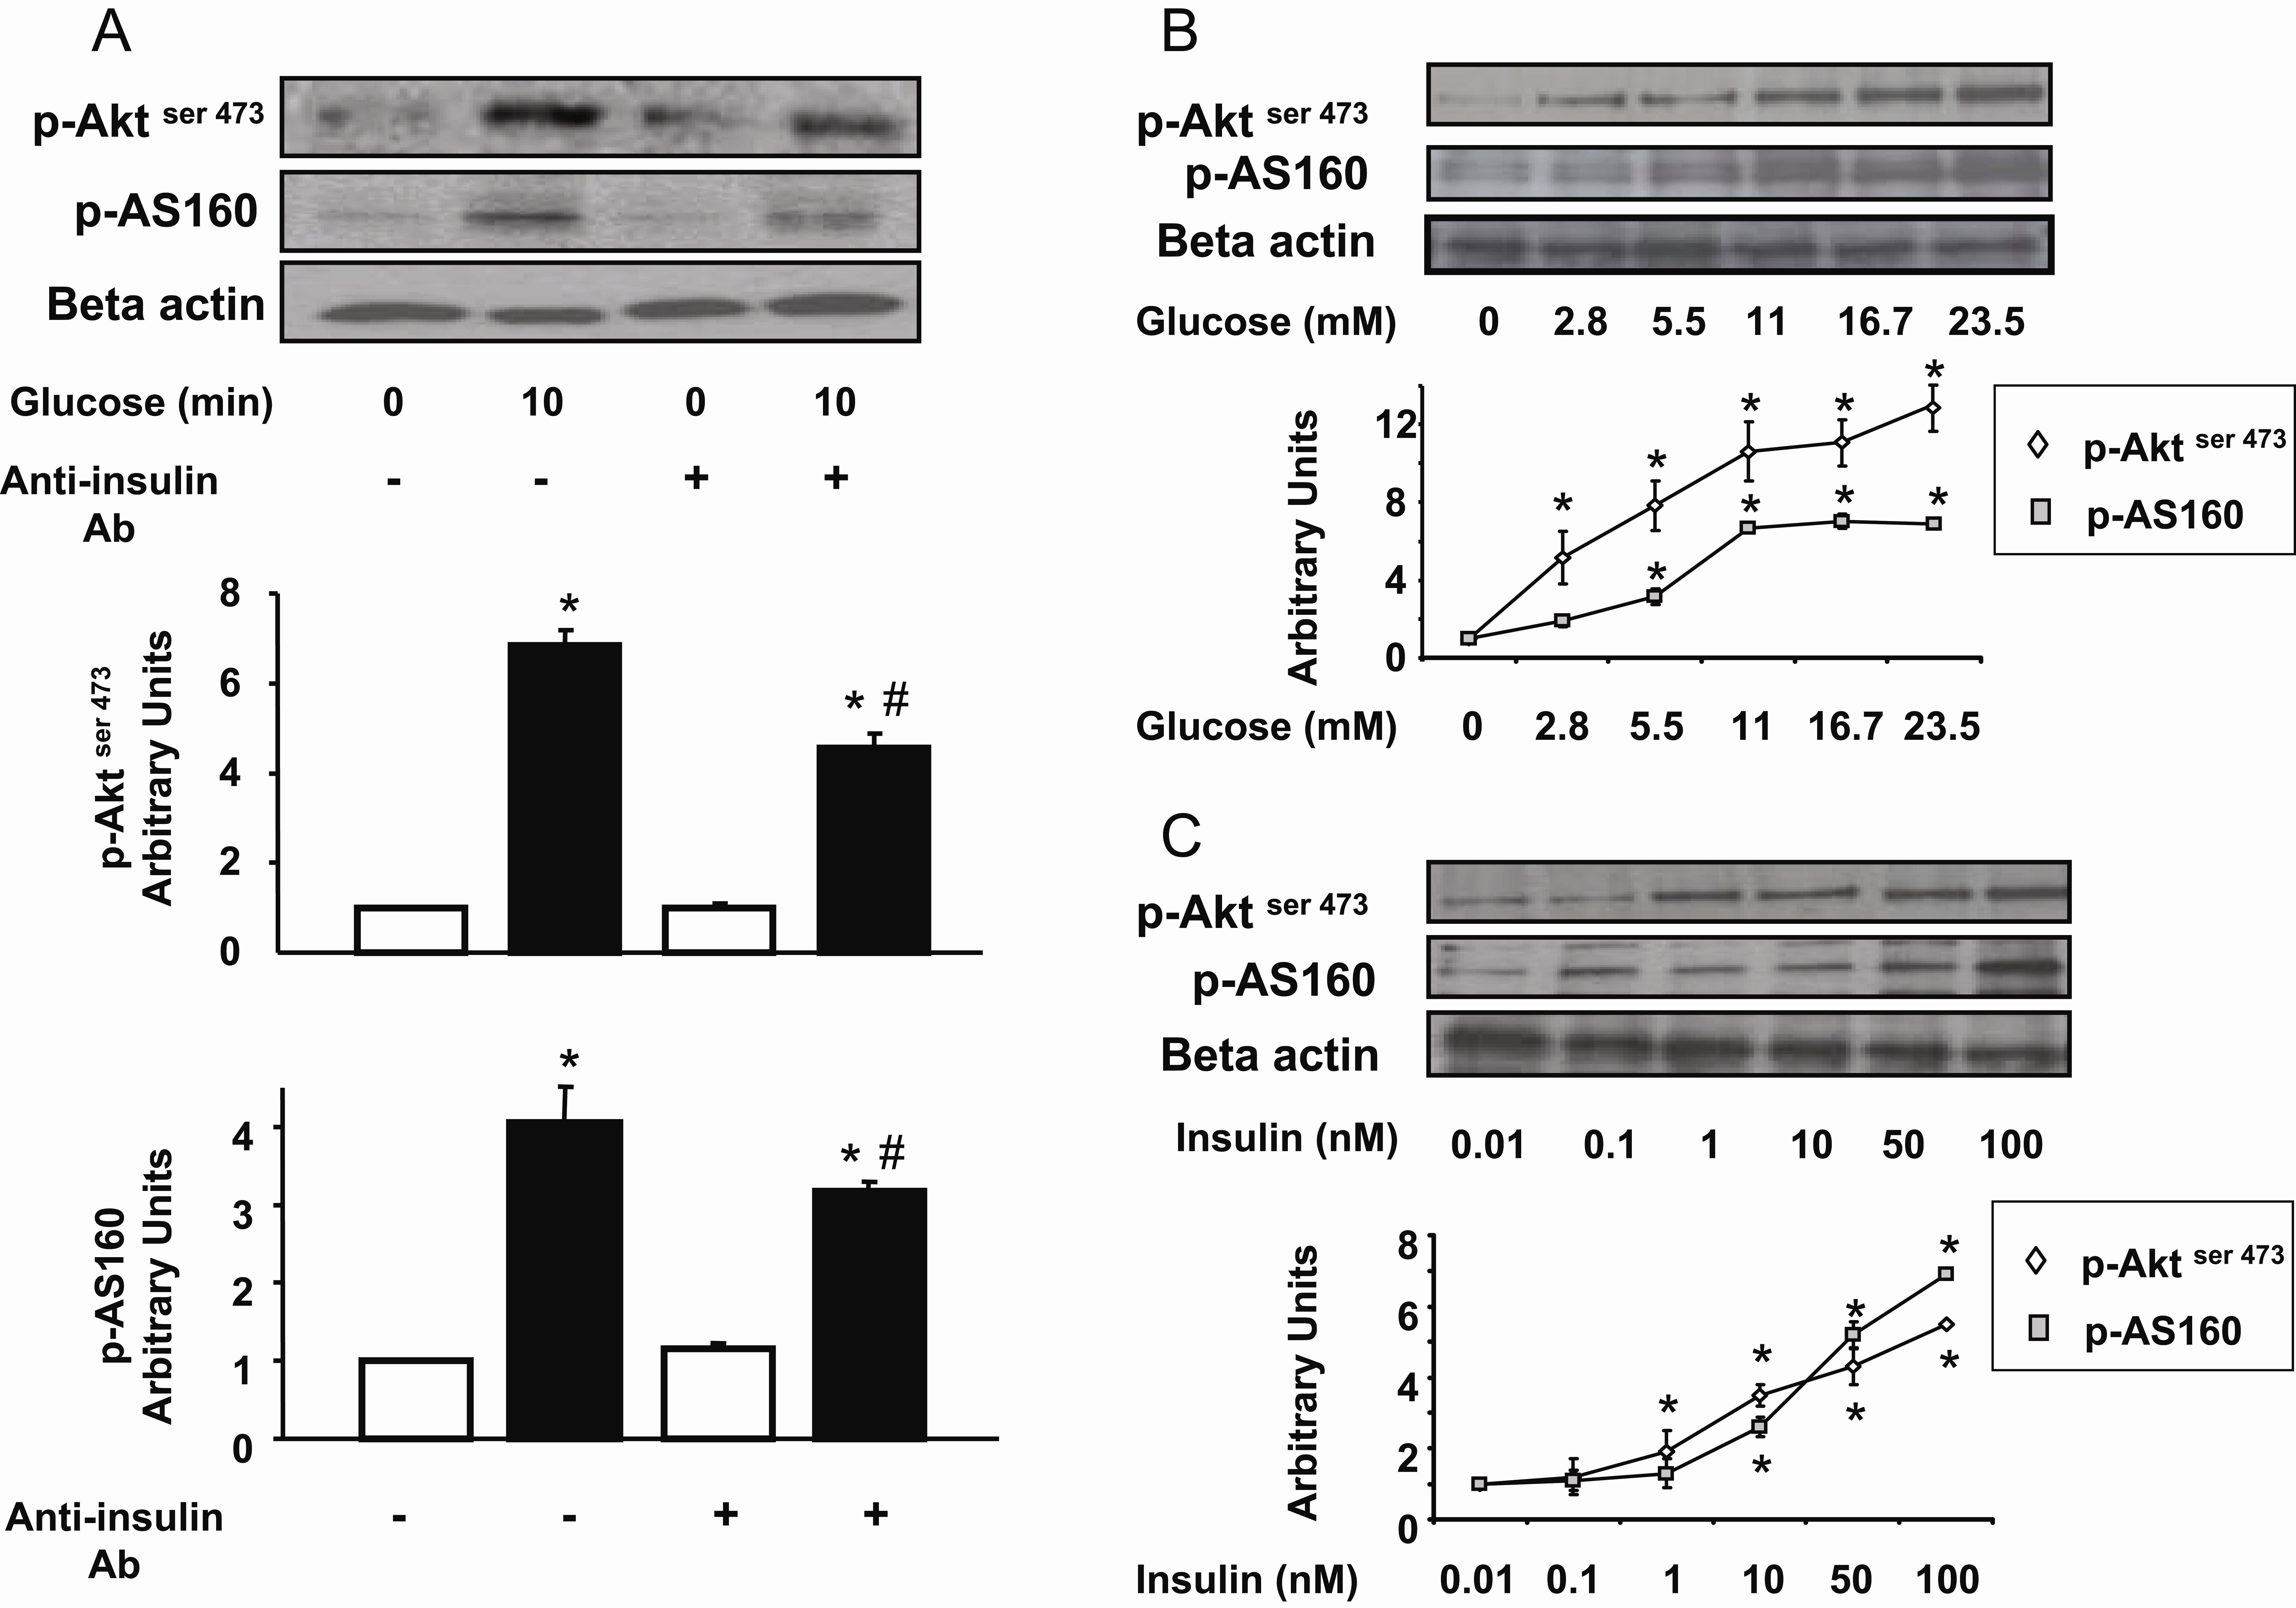
FIGURE 2**

**
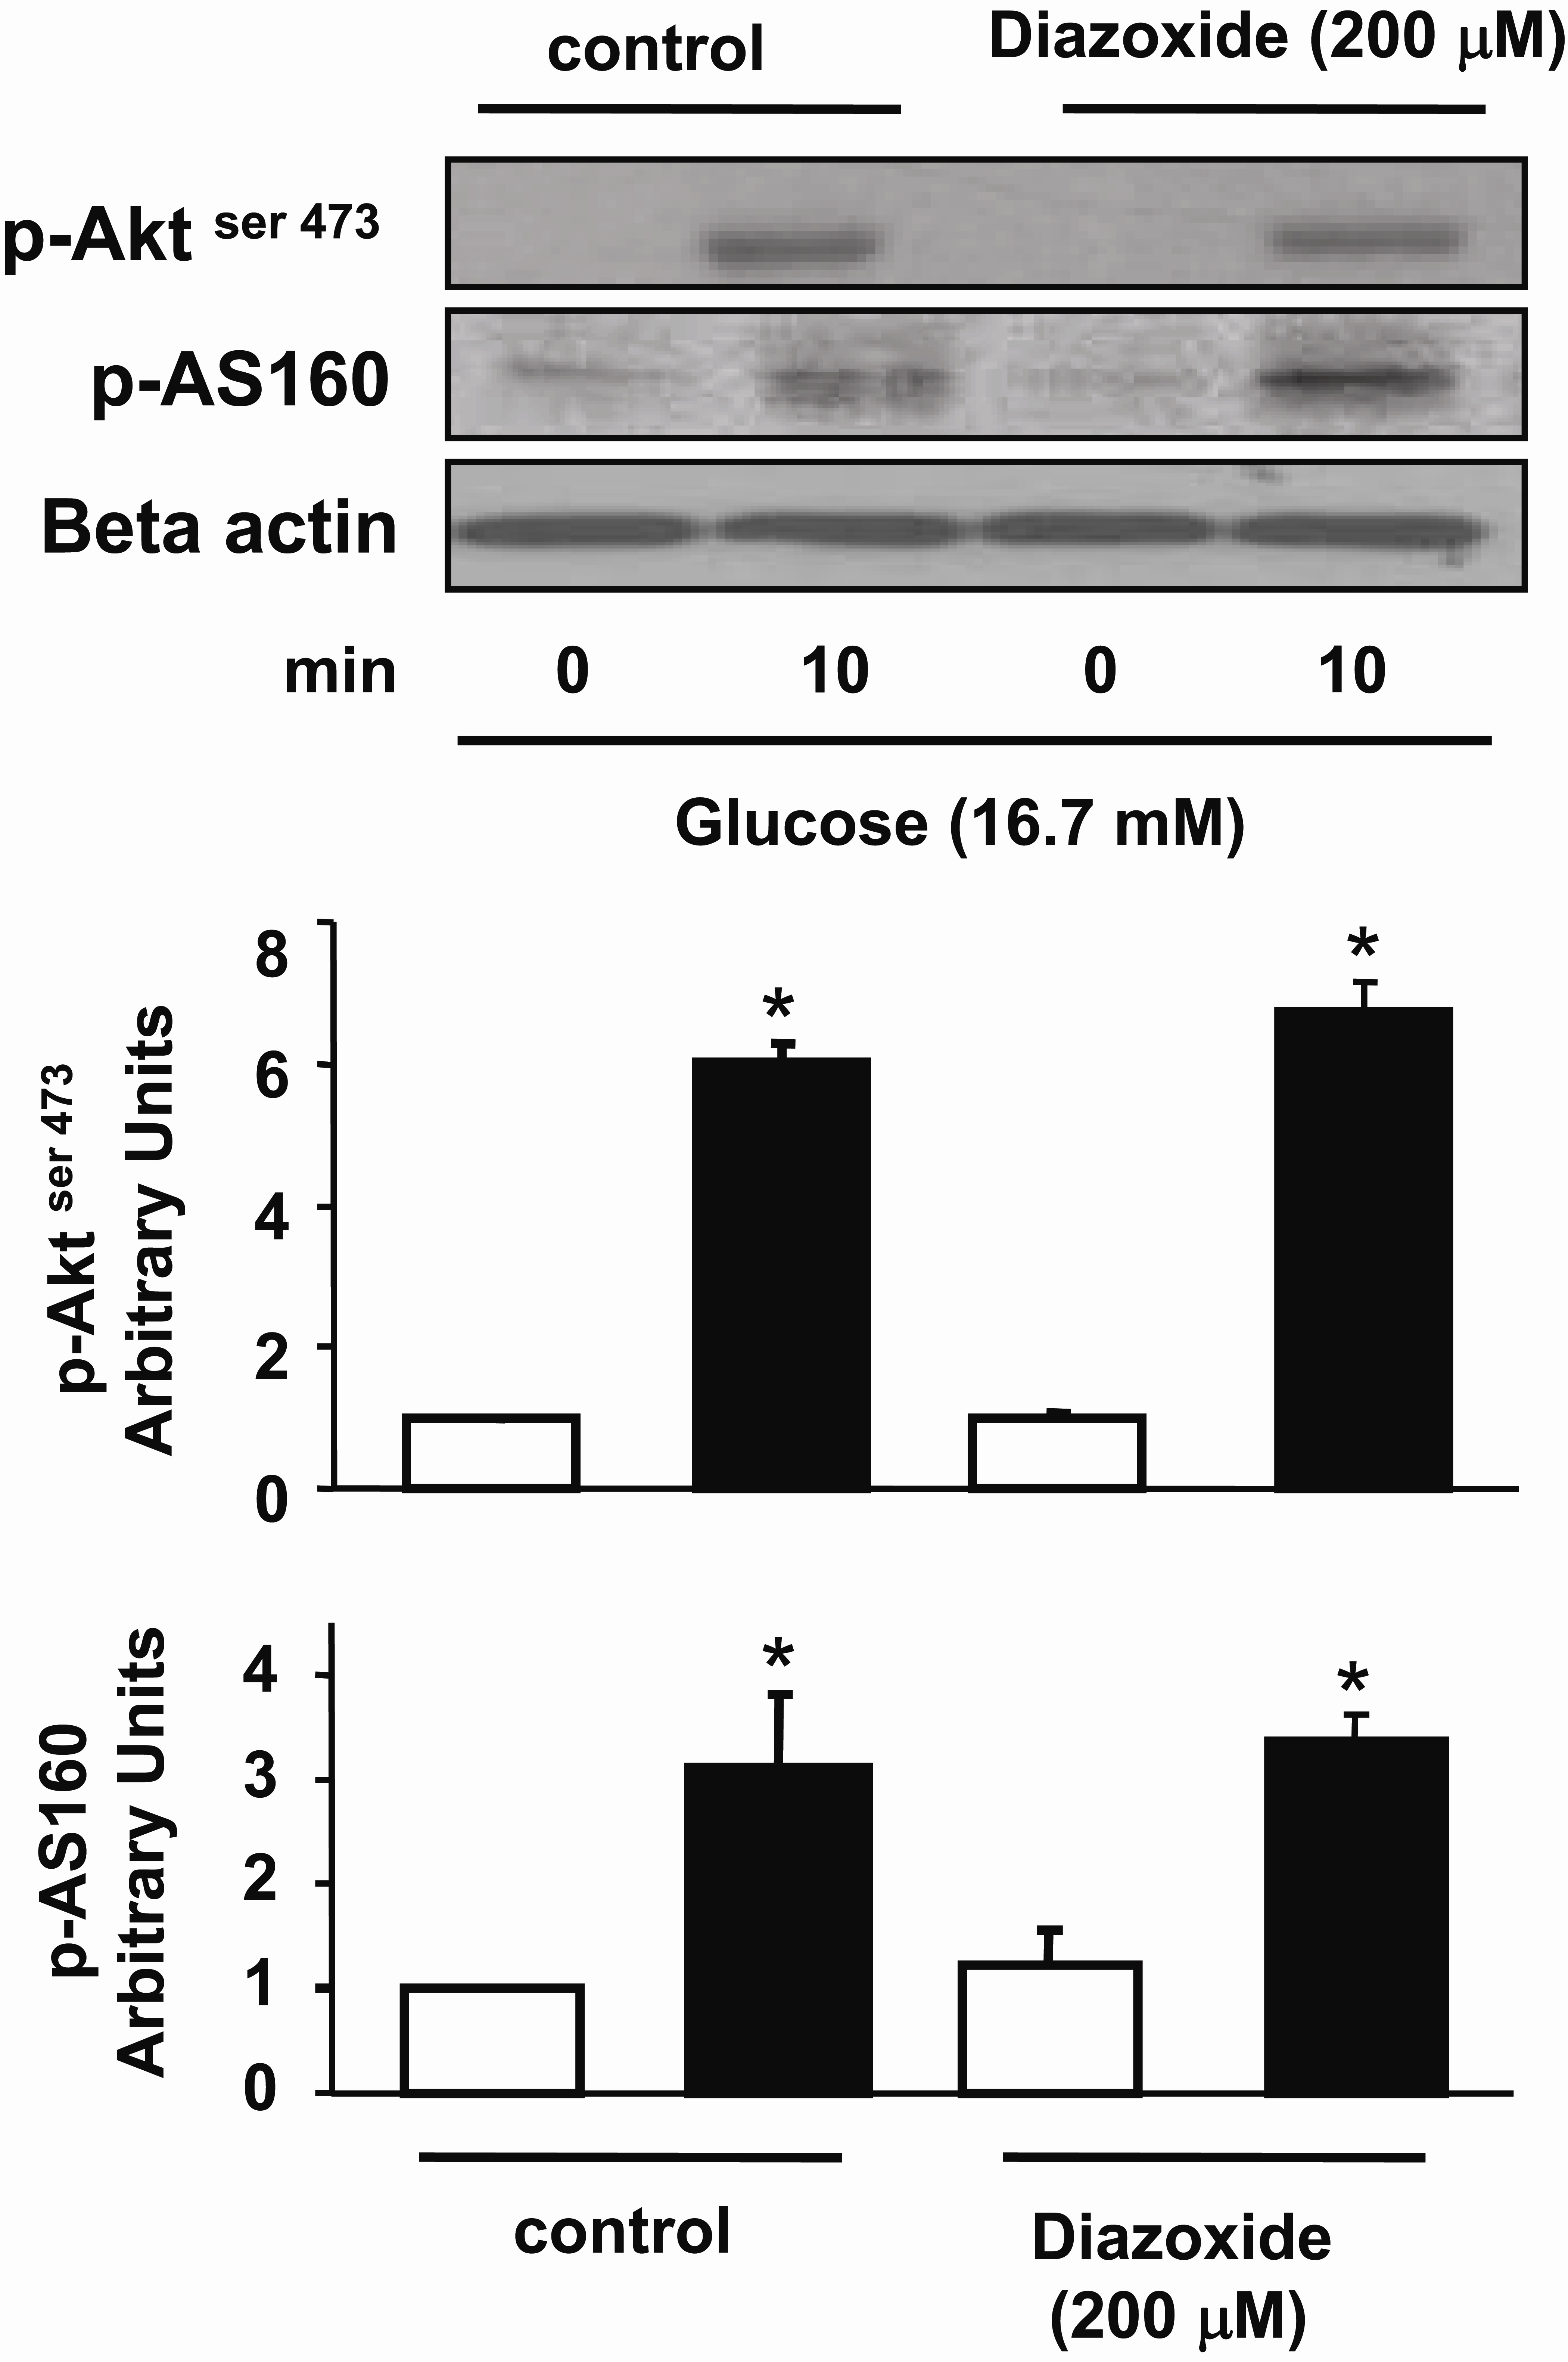
FIGURE 3**

**
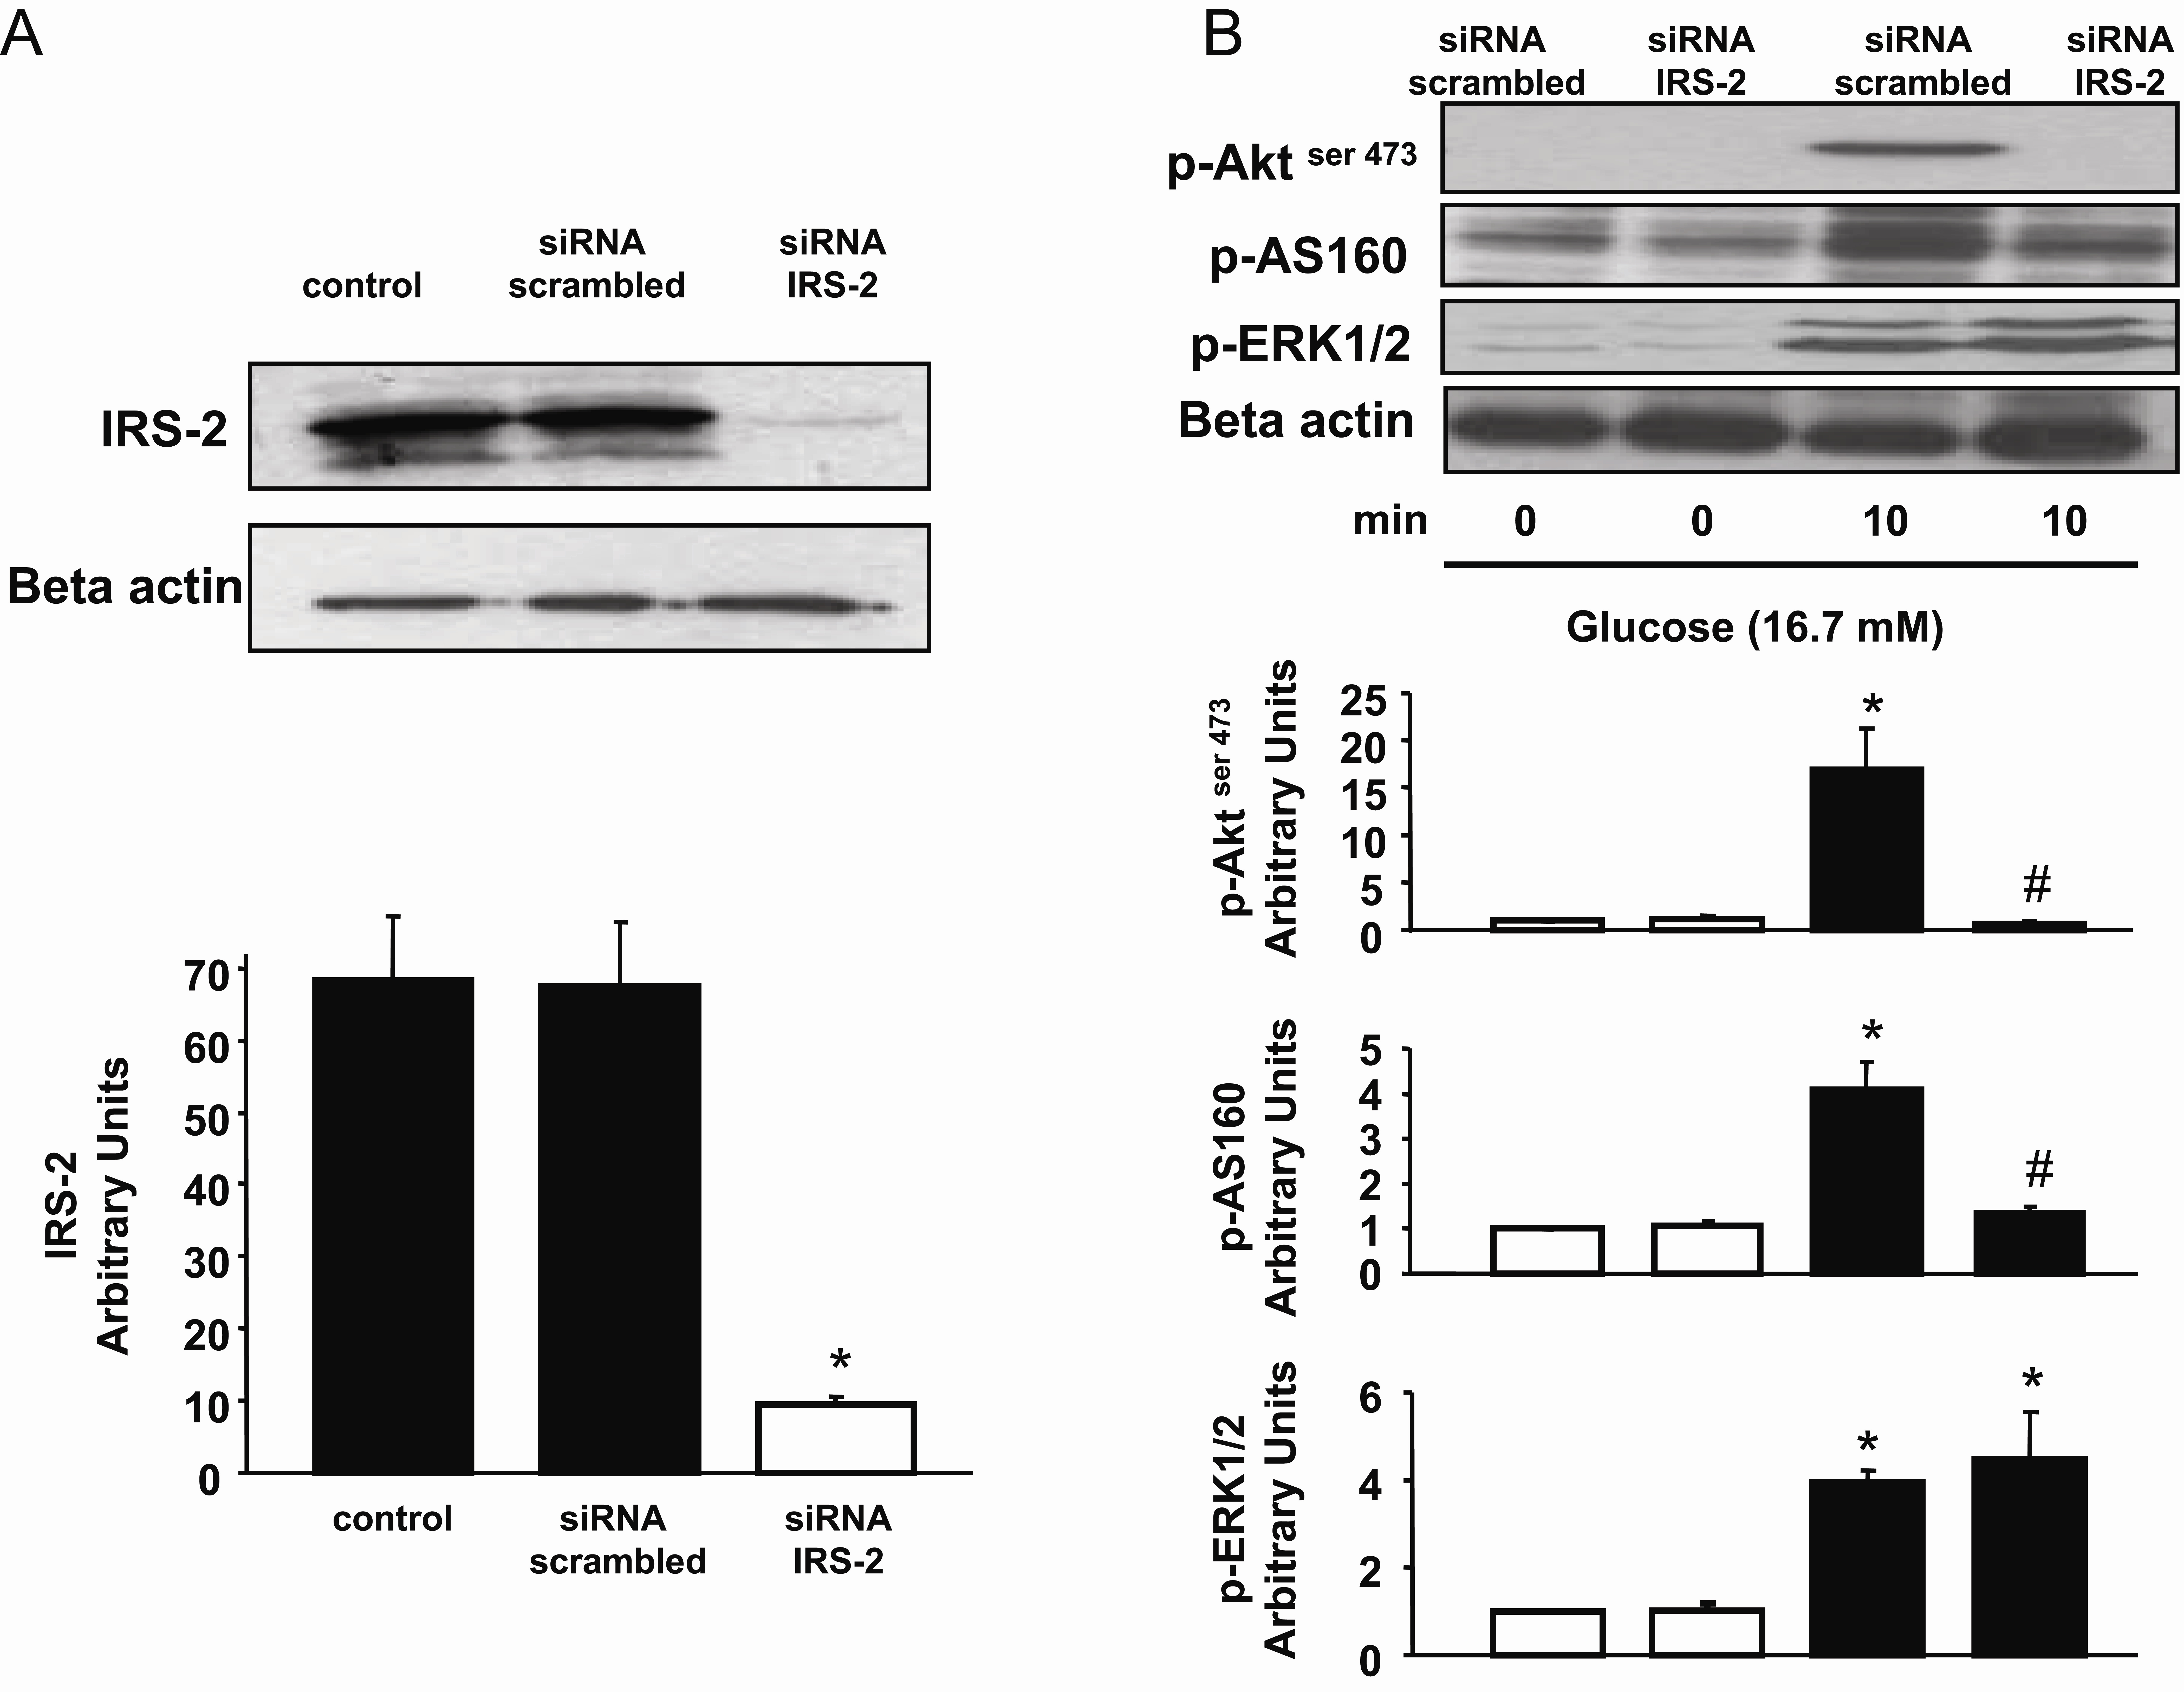
FIGURE 4**

**
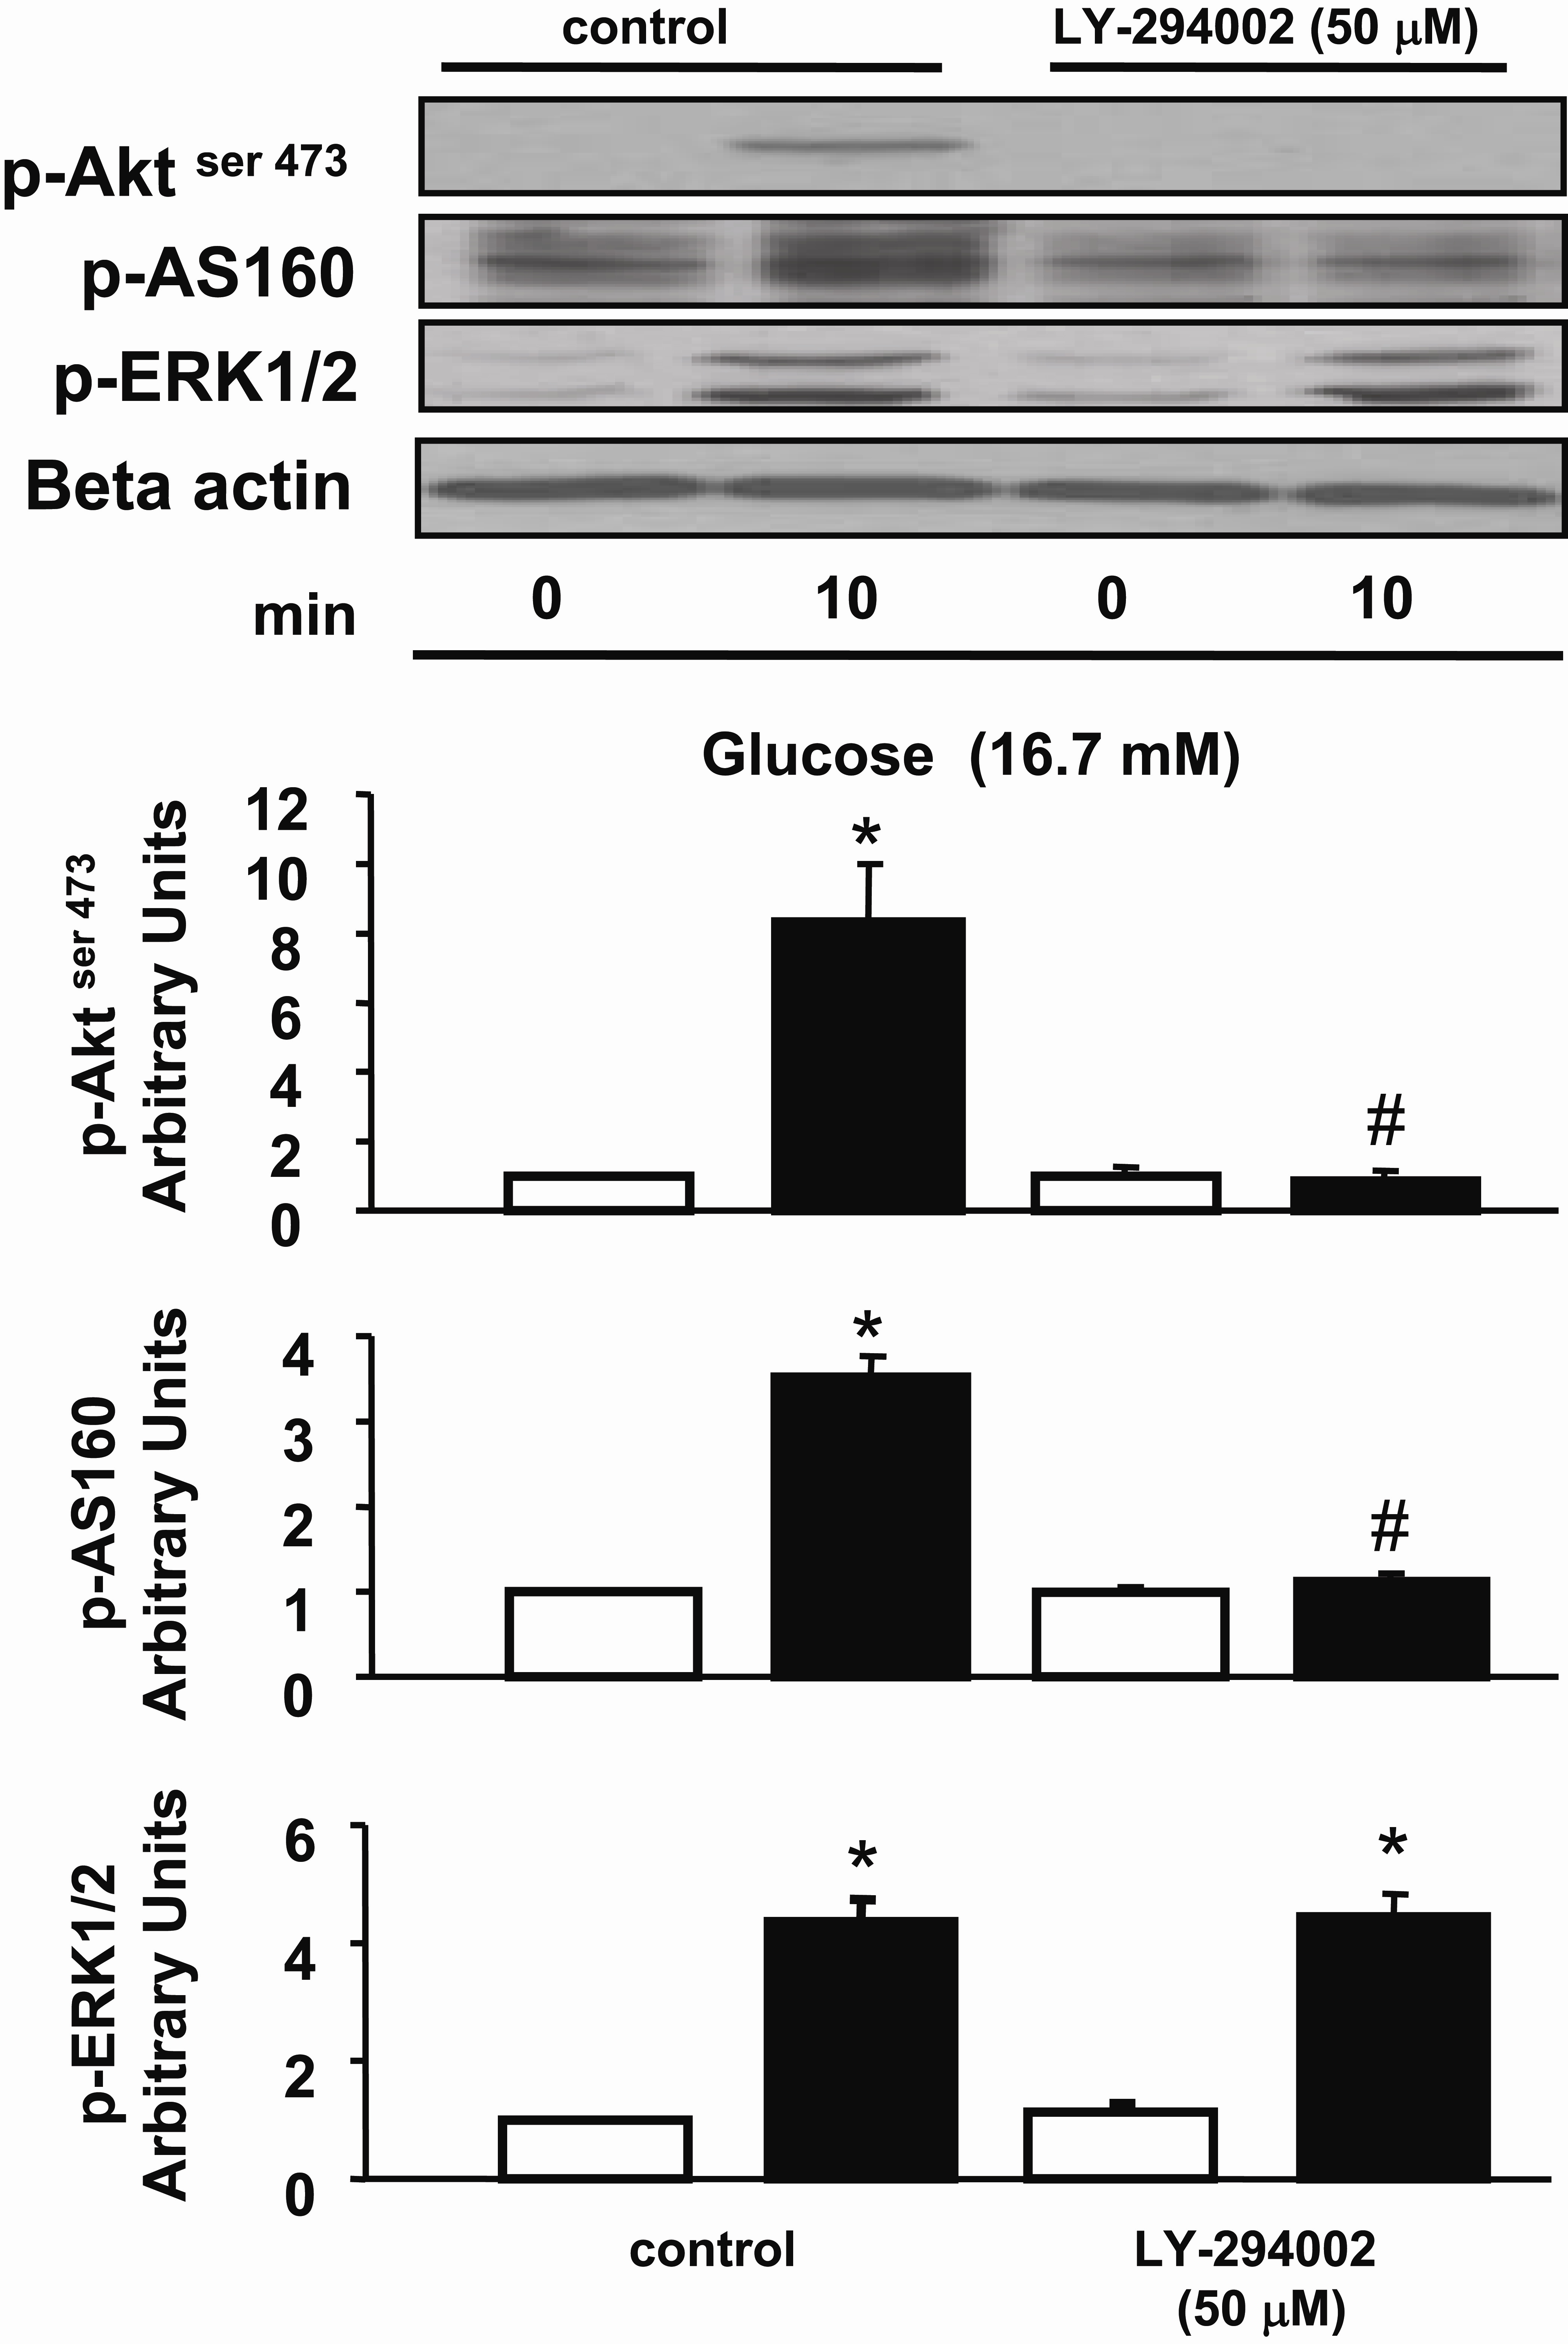
FIGURE 5**

**
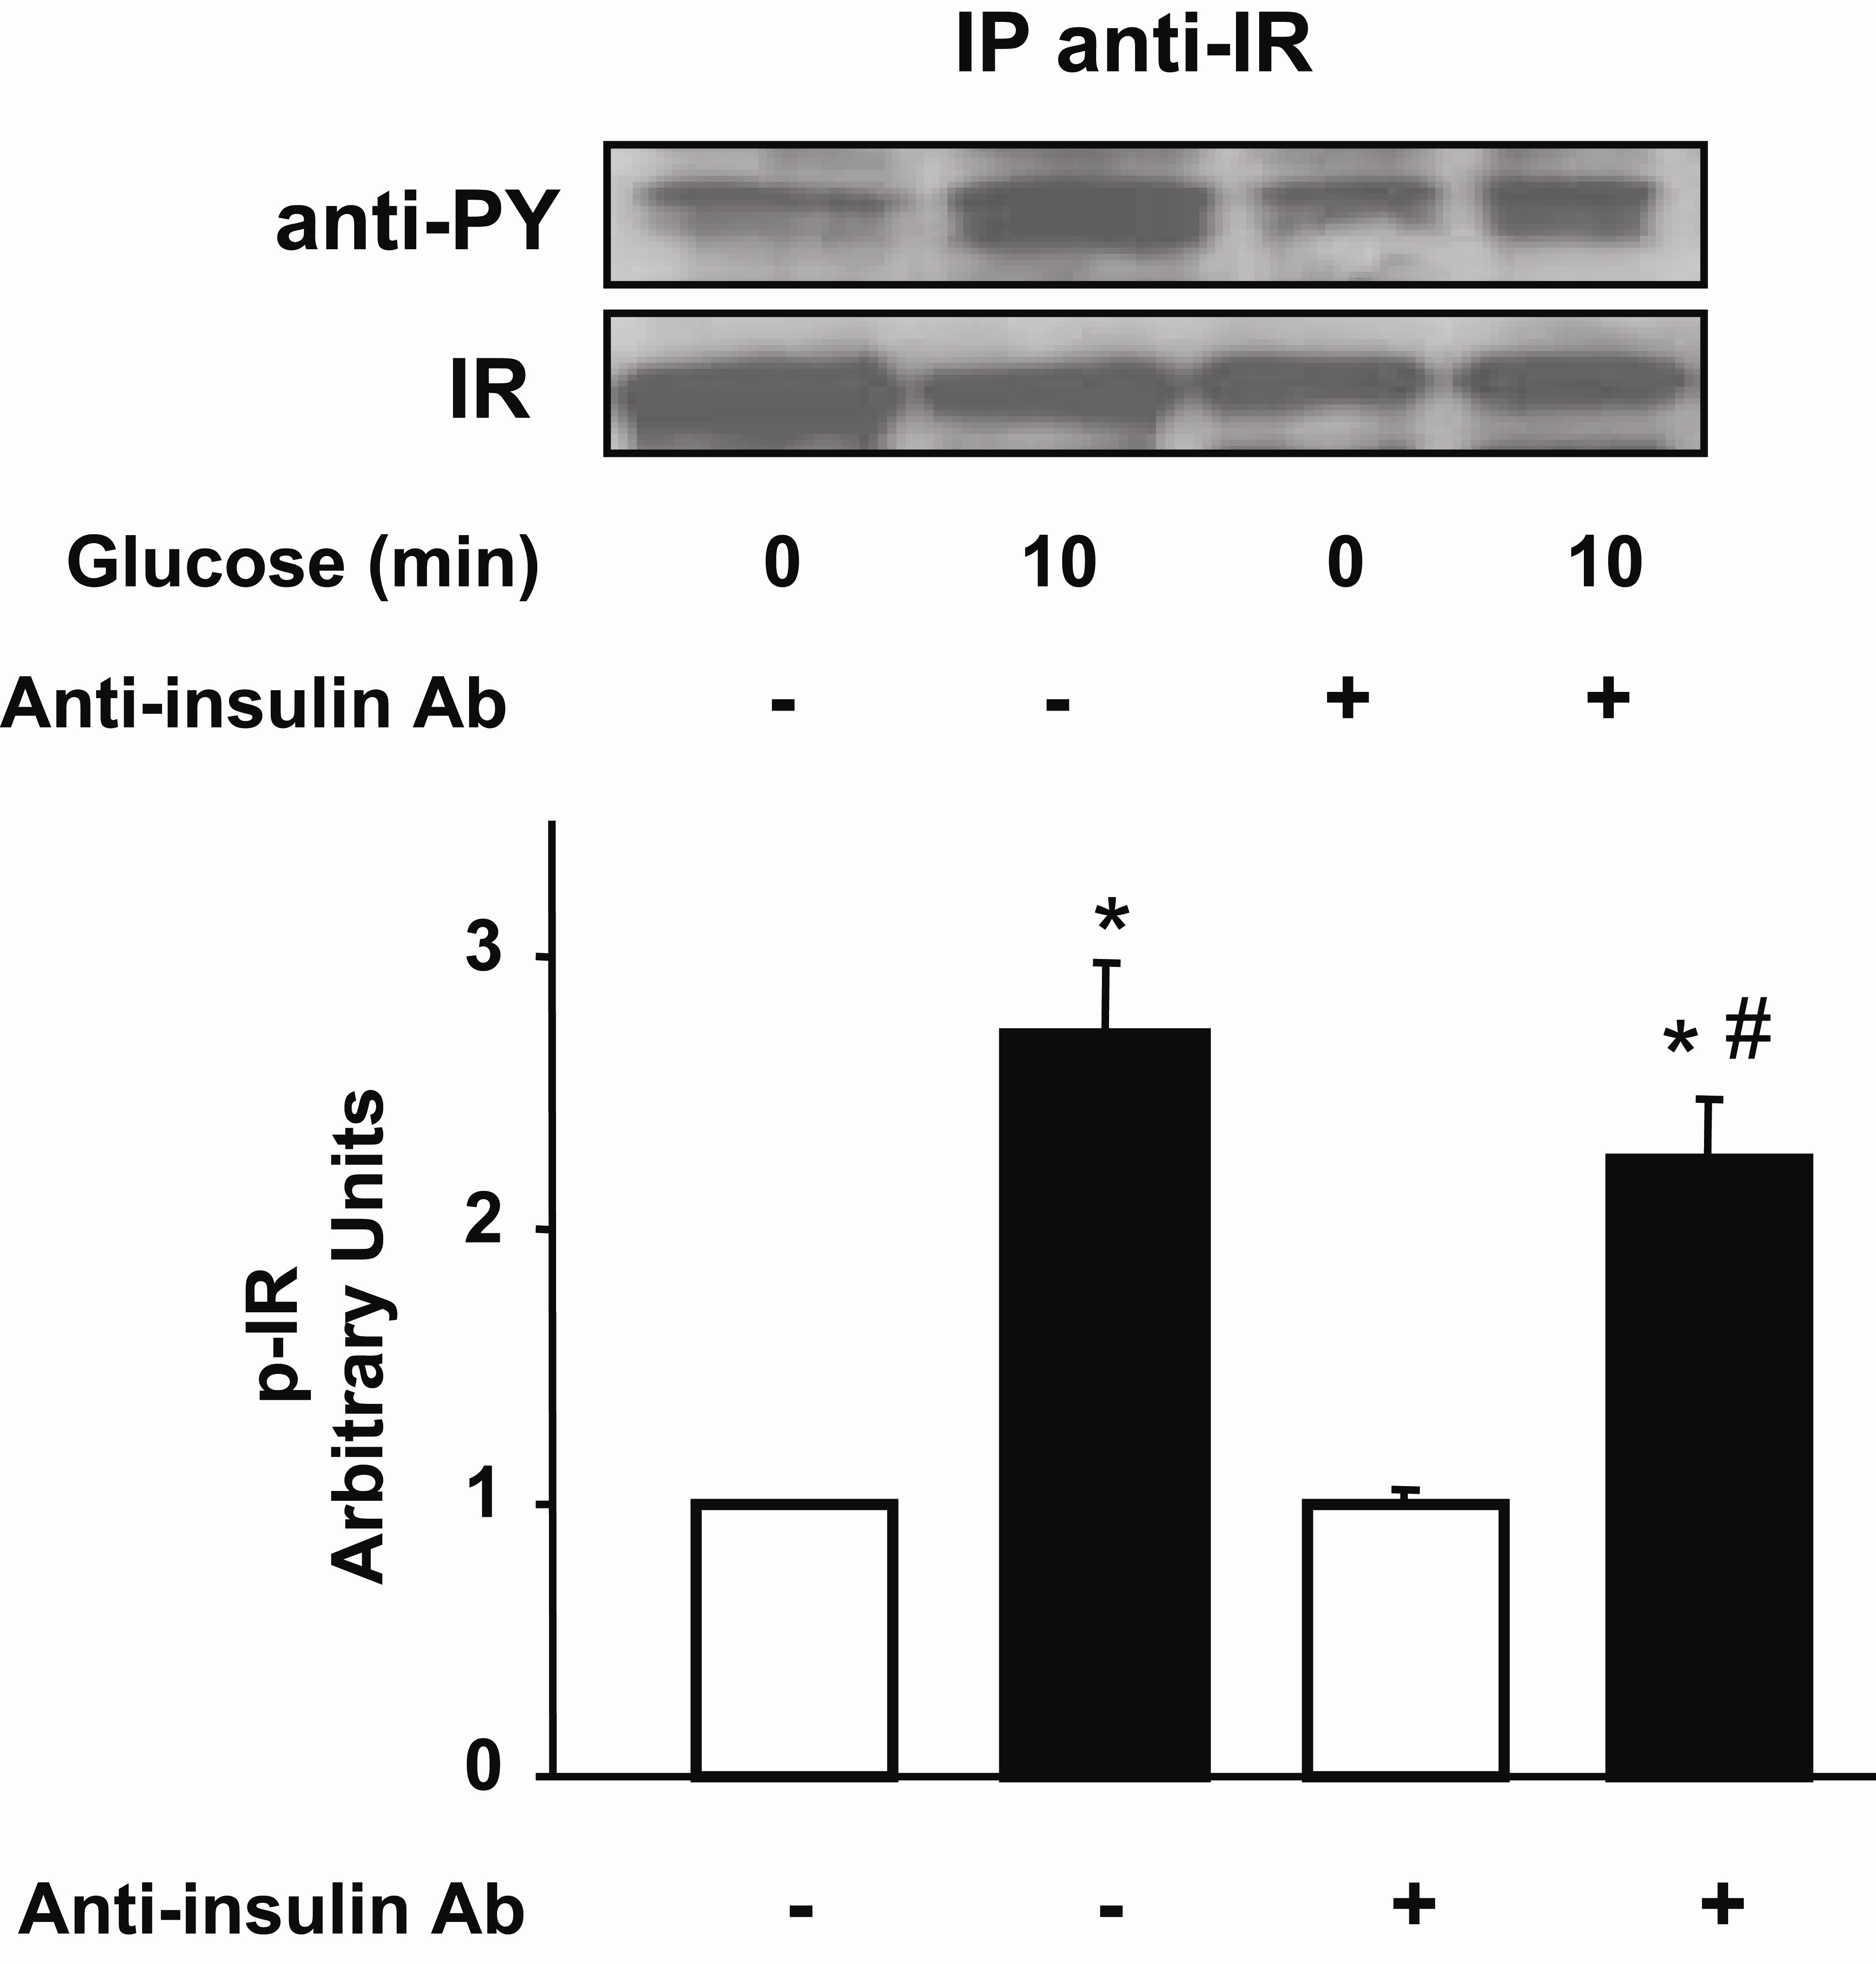
FIGURE 6**

**
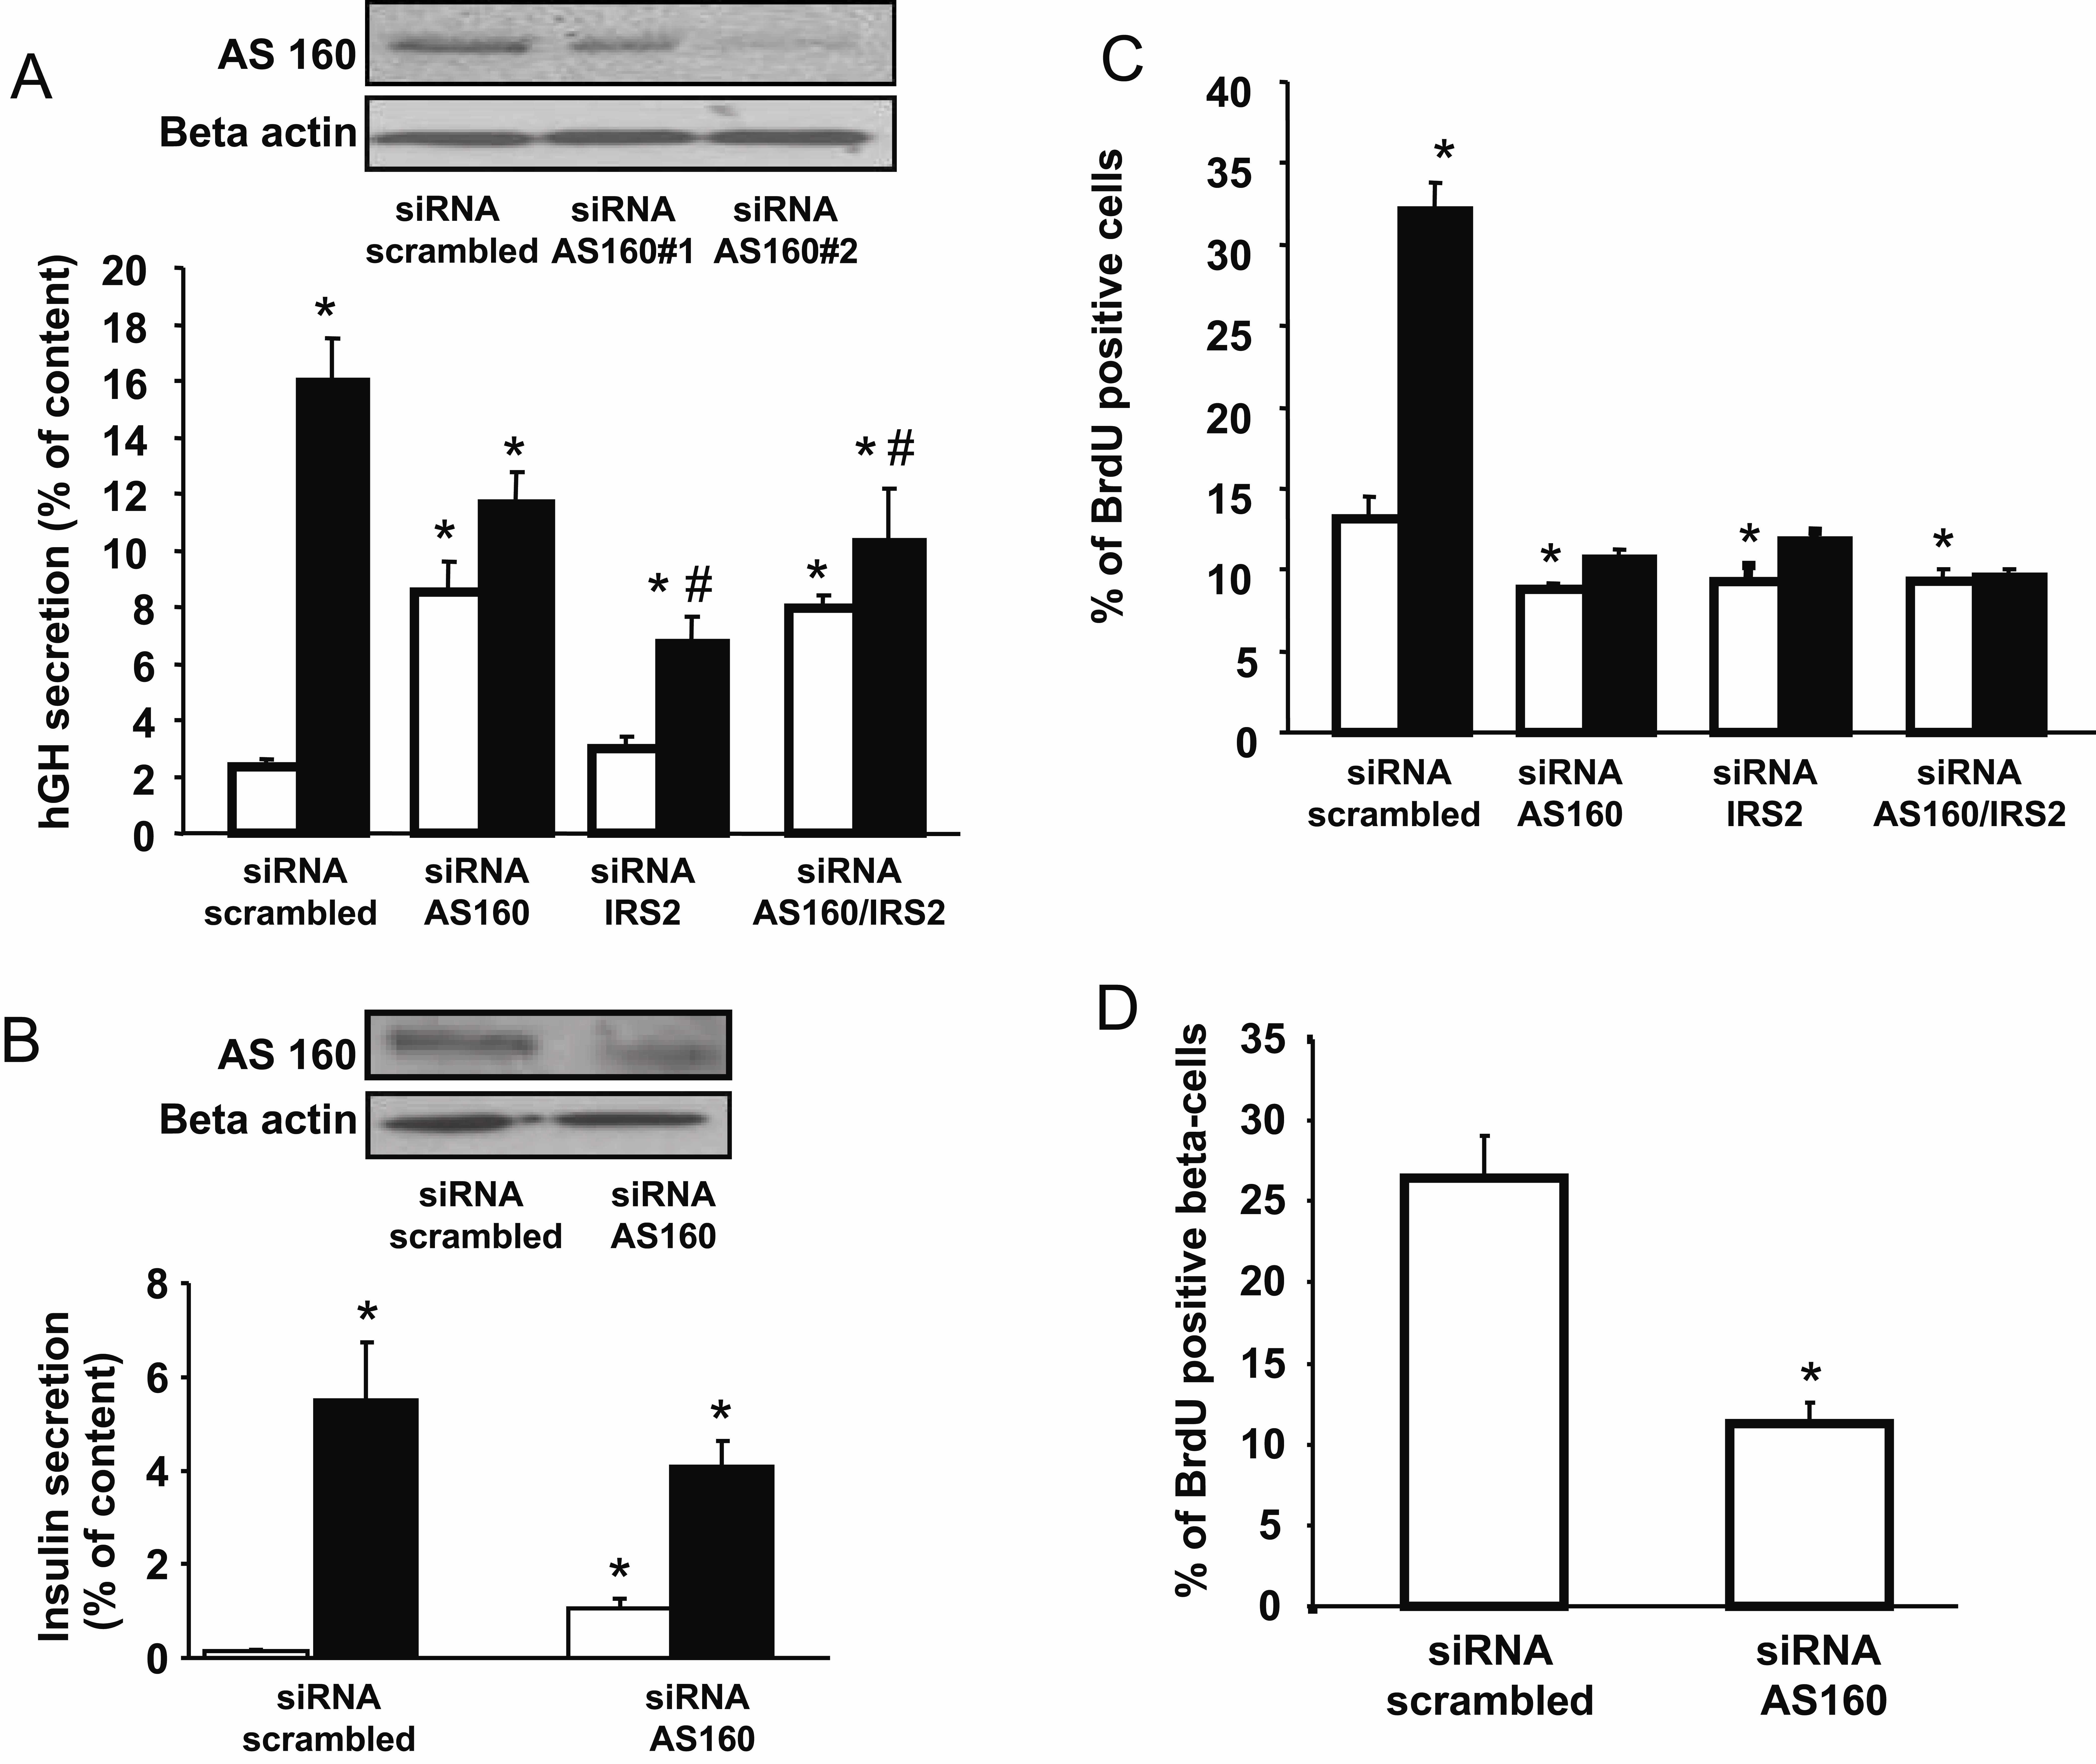
FIGURE 7**

**
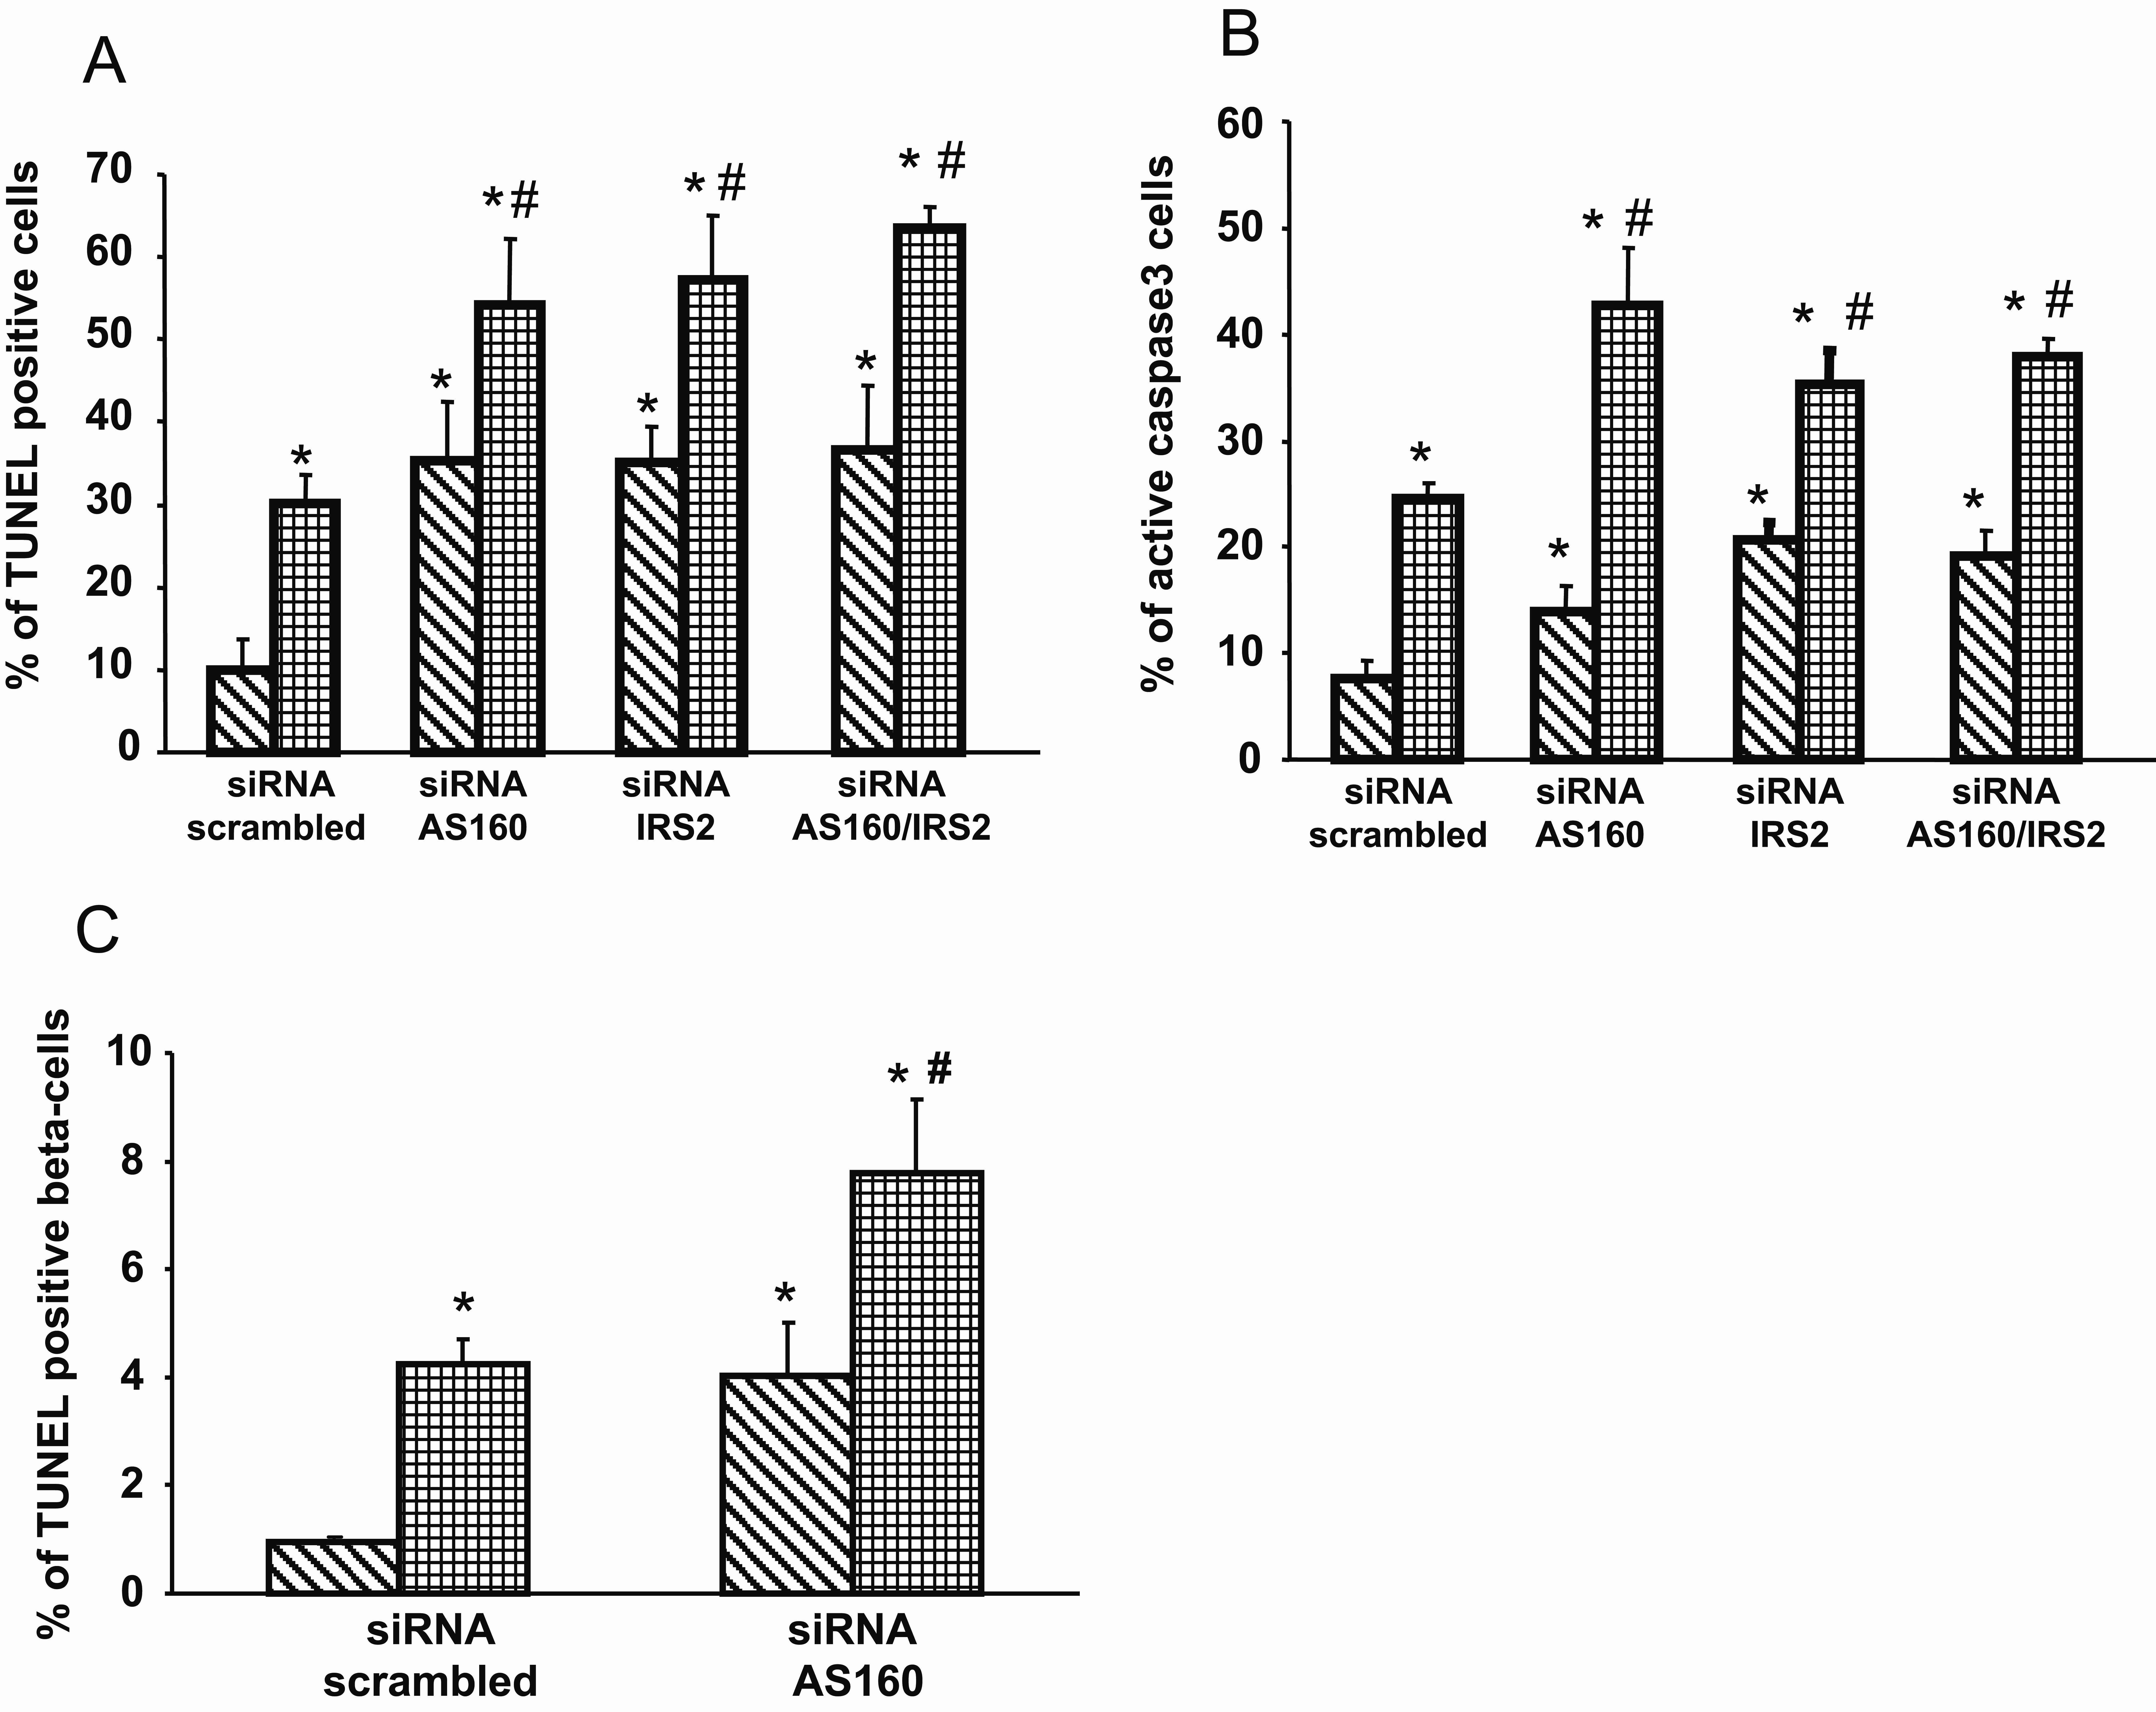
FIGURE 8**

Supplement: db071469figures.doc [file db071469figures.doc]
